# Supplementary material for: Mitigation of Olanzapine-Induced Weight Gain With Samidorphan, an Opioid Antagonist: A Randomized Double-Blind Phase 2 Study in Patients With Schizophrenia
Source: Atypon-hosted journal article supplement (doi:10.1176/appi.ajp.2018.18030280), 2019-03-08
Supplement: appi.ajp.2018.18030280.ds001.pdf [file appi.ajp.2018.18030280.ds001.pdf]

**FIGURE S1. Study design**

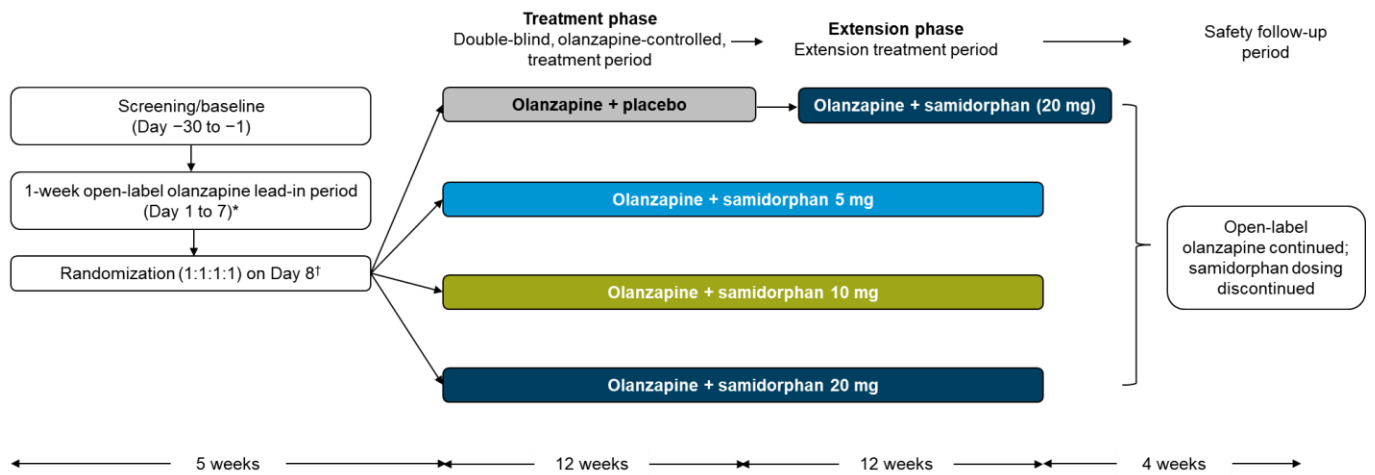

\*Olanzapine dosing was flexible (5–20 mg/day); †randomization was stratified by weight change during the 1-week open-label olanzapine lead-in period.

**TABLE S1. Patient baseline demographics and characteristics\***

| Category                      | Olanzapine + placebo<br>(N = 75) |      | Olanzapine + samidorphan 5 mg<br>(N = 80) |      | Olanzapine + samidorphan 10 mg<br>(N = 86) |      | Olanzapine + samidorphan 20 mg<br>(N = 68) |      | All olanzapine + samidorphan<br>(N = 234) |      | All patients<br>(N = 309) |      |
|-------------------------------|----------------------------------|------|-------------------------------------------|------|--------------------------------------------|------|--------------------------------------------|------|-------------------------------------------|------|---------------------------|------|
|                               | Years                            | SD   | Years                                     | SD   | Years                                      | SD   | Years                                      | SD   | Years                                     | SD   | Years                     | SD   |
| Age                           | 40.3                             | 8.1  | 37.9                                      | 8.6  | 38.1                                       | 8.0  | 39.3                                       | 8.4  | 38.4                                      | 8.3  | 38.8                      | 8.3  |
| Male                          | n                                | %    | n                                         | %    | n                                          | %    | n                                          | %    | n                                         | %    | n                         | %    |
|                               | 53                               | 70.7 | 60                                        | 75.0 | 65                                         | 75.6 | 50                                         | 73.5 | 175                                       | 74.8 | 228                       | 73.8 |
| <b>Primary race</b>           |                                  |      |                                           |      |                                            |      |                                            |      |                                           |      |                           |      |
| Black/African-American        | 44                               | 58.7 | 53                                        | 66.3 | 50                                         | 58.1 | 42                                         | 61.8 | 145                                       | 62.0 | 189                       | 61.2 |
| White                         | 28                               | 37.3 | 26                                        | 32.5 | 35                                         | 40.7 | 23                                         | 33.8 | 84                                        | 35.9 | 112                       | 36.2 |
| Other                         | 3                                | 4.0  | 0                                         |      | 1                                          | 1.2  | 3                                          | 4.4  | 4                                         | 1.7  | 7                         | 2.3  |
| <b>Ethnicity</b>              |                                  |      |                                           |      |                                            |      |                                            |      |                                           |      |                           |      |
| Hispanic or Latino            | 4                                | 5.3  | 5                                         | 6.3  | 5                                          | 5.8  | 3                                          | 4.4  | 13                                        | 5.6  | 17                        | 5.5  |
| Not Hispanic or Latino        | 71                               | 94.7 | 75                                        | 93.8 | 81                                         | 94.2 | 65                                         | 95.6 | 221                                       | 94.4 | 292                       | 94.5 |
| <b>Region</b>                 |                                  |      |                                           |      |                                            |      |                                            |      |                                           |      |                           |      |
| US                            | 60                               | 80.0 | 68                                        | 85.0 | 70                                         | 81.4 | 60                                         | 88.2 | 19                                        | 84.6 | 258                       | 83.5 |
| Non-US                        | 15                               | 20.0 | 12                                        | 15.0 | 16                                         | 18.6 | 8                                          | 11.8 | 36                                        | 15.4 | 51                        | 16.5 |
| Weight                        | kg                               | SD   | kg                                        | SD   | kg                                         | SD   | kg                                         | SD   | kg                                        | SD   | kg                        | SD   |
|                               | 75.6                             | 12.3 | 77.5                                      | 13.1 | 76.7                                       | 13.7 | 75.4                                       | 12.8 | 76.6                                      | 13.2 | 76.4                      | 13.0 |
| BMI                           | kg/m <sup>2</sup>                | SD   | kg/m <sup>2</sup>                         | SD   | kg/m <sup>2</sup>                          | SD   | kg/m <sup>2</sup>                          | SD   | kg/m <sup>2</sup>                         | SD   | kg/m <sup>2</sup>         | SD   |
|                               | 25.1                             | 3.4  | 25.7                                      | 3.2  | 25.0                                       | 3.2  | 24.8                                       | 3.4  | 25.2                                      | 3.3  | 25.                       | 3.3  |
| PANSS total score             | Score                            | SD   | Score                                     | SD   | Score                                      | SD   | Score                                      | SD   | Score                                     | SD   | Score                     | SD   |
|                               | 62.7                             | 10.1 | 61.7                                      | 10.0 | 62.6                                       | 9.8  | 64.5                                       | 9.5  | 62.8                                      | 9.8  | 62.8                      | 9.9  |
| CGI-S                         | Score                            | SD   | Score                                     | SD   | Score                                      | SD   | Score                                      | SD   | Score                                     | SD   | Score                     | SD   |
|                               | 2.9                              | 0.31 | 2.8                                       | 0.41 | 2.8                                        | 0.39 | 2.9                                        | 0.29 | 2.9                                       | 0.37 | 2.9                       | 0.4  |
| <b>Concomitant medication</b> |                                  |      |                                           |      |                                            |      |                                            |      |                                           |      |                           |      |
|                               | n                                | %    | n                                         | %    | n                                          | %    | n                                          | %    | n                                         | %    | n                         | %    |
| Lorazepam                     | 4                                | 5.3  | 3                                         | 3.8  | 6                                          | 7.0  | 8                                          | 11.8 | 17                                        | 7.3  | 38                        | 12.3 |
| Benzatropine mesilate         | 3                                | 4.0  | 6                                         | 7.5  | 5                                          | 5.8  | 7                                          | 10.3 | 18                                        | 7.7  | 39                        | 12.6 |
| Contraceptives <sup>†</sup>   | 23                               | 30.7 | 17                                        | 21.3 | 20                                         | 23.3 | 17                                         | 25.0 | 54                                        | 23.1 | 131                       | 42.4 |
| Trazodone                     | 4                                | 5.3  | 2                                         | 2.5  | 10                                         | 11.6 | 9                                          | 13.2 | 21                                        | 9.0  | 46                        | 14.9 |
| Risperidone                   | 5                                | 6.7  | 8                                         | 10.0 | 8                                          | 9.3  | 3                                          | 4.4  | 19                                        | 8.1  | 43                        | 13.9 |
| Ibuprofen                     | 9                                | 12.0 | 3                                         | 3.8  | 4                                          | 4.7  | 9                                          | 13.2 | 16                                        | 6.8  | 41                        | 13.3 |

\*Percentages are based on the number of patients in the safety population; <sup>†</sup>Contraceptives include intrauterine devices and intravaginal contraceptives. All values are mean ± SD. BMI, body mass index; CGI-S, Clinical Global Impressions-Severity; PANSS, Positive and Negative Syndrome Scale.
